# Supplementary material for: Inflammation and Proliferation Act Together to Mediate Intestinal Cell Fusion
Source: PubMed Central journal article supplement (PMC2716548; doi:10.1371/journal.pone.0006530), 2009-08-06
Supplement: pone.0006530.s008.pdf [file pone.0006530.s008.pdf]

**Supplementary Table-S1 (Wong)**

|                                                                              |                                           | <u>Fold-Change</u>            |                  |
|------------------------------------------------------------------------------|-------------------------------------------|-------------------------------|------------------|
| <b>cDNA</b>                                                                  | <b>Relative to</b>                        | <b>IL-1<math>\beta</math></b> | <b>Mchr1</b>     |
| <b>IL10<sup>-/-</sup><br/>Colonic Epithelium</b>                             | WT<br>Colonic Epithelium                  | 6.7                           | N.D.             |
| <b>IL10<sup>-/-</sup><br/>Colonic Epithelium + 5-ASA</b>                     | IL10 <sup>-/-</sup><br>Colonic Epithelium | -303                          | -3.7             |
| <b>IL10<sup>-/-</sup><br/>Colonic Mesenchyme + 5-ASA</b>                     | IL10 <sup>-/-</sup><br>Colonic Mesenchyme | -24                           | N/A <sup>a</sup> |
| <b>Induced AhCre<sup>+</sup>;Apc<sup>-/-</sup><br/>Intestinal Epithelium</b> | WT Mock Induced<br>Intestinal Epithelium  | -1.01                         | -1.09            |

<sup>a</sup> not expressed in mesenchyme; N.D., Not Determined
